# Supplementary material for: Spinothalamic Tract Microstructure as a Common Neural Substrate of Pain Sensitivity Across Modalities: A Combined Brain-Spinal Cord Diffusion Imaging Study
Source: Research Square preprint supplement (doi:10.21203/rs.3.rs-8640197/v1), 2026-01-27
Supplement: Supplementary file 1 [file 74b272560cbda24136f353ee.docx]

Supporting Information

**Spinothalamic Tract Microstructure as a Common Neural Substrate of Pain Sensitivity Across Modalities: A Combined Brain-Spinal Cord Diffusion Imaging Study**

Leiming Wu 1, 2, Binglan Li 1,2, Zhaoxing Wei 3,4,5, Xiaomin Lin 3,4, Yazhuo Kong3,4*,

Jixin Liu 1, 2*

**Methods**

1. **Participants**

For dataset 3, eligibility required that during a two-week screening period, participants reported loose stools (Bristol Stool Scale types 6-7) on at least four days, and hard stools (types 1-2) on no more than three days in the preceding week, alongside a mean daily abdominal pain score of at least 3. Exclusion criteria included organic gastrointestinal disease such as inflammatory bowel disease or celiac disease, chronic pain disorders such as fibromyalgia or migraine, psychiatric or neurological disorders, pregnancy, use of IBS-specific prescription medications within the preceding three months, a history of nicotine, alcohol, or drug abuse, and contraindications to MRI such as claustrophobia. Participants meeting alarm criteria (≥10% unexplained weight loss in three months, rectal bleeding not from hemorrhoids, nocturnal diarrhea, or family history of colorectal cancer) had normal endoscopic evaluations within the past two years.


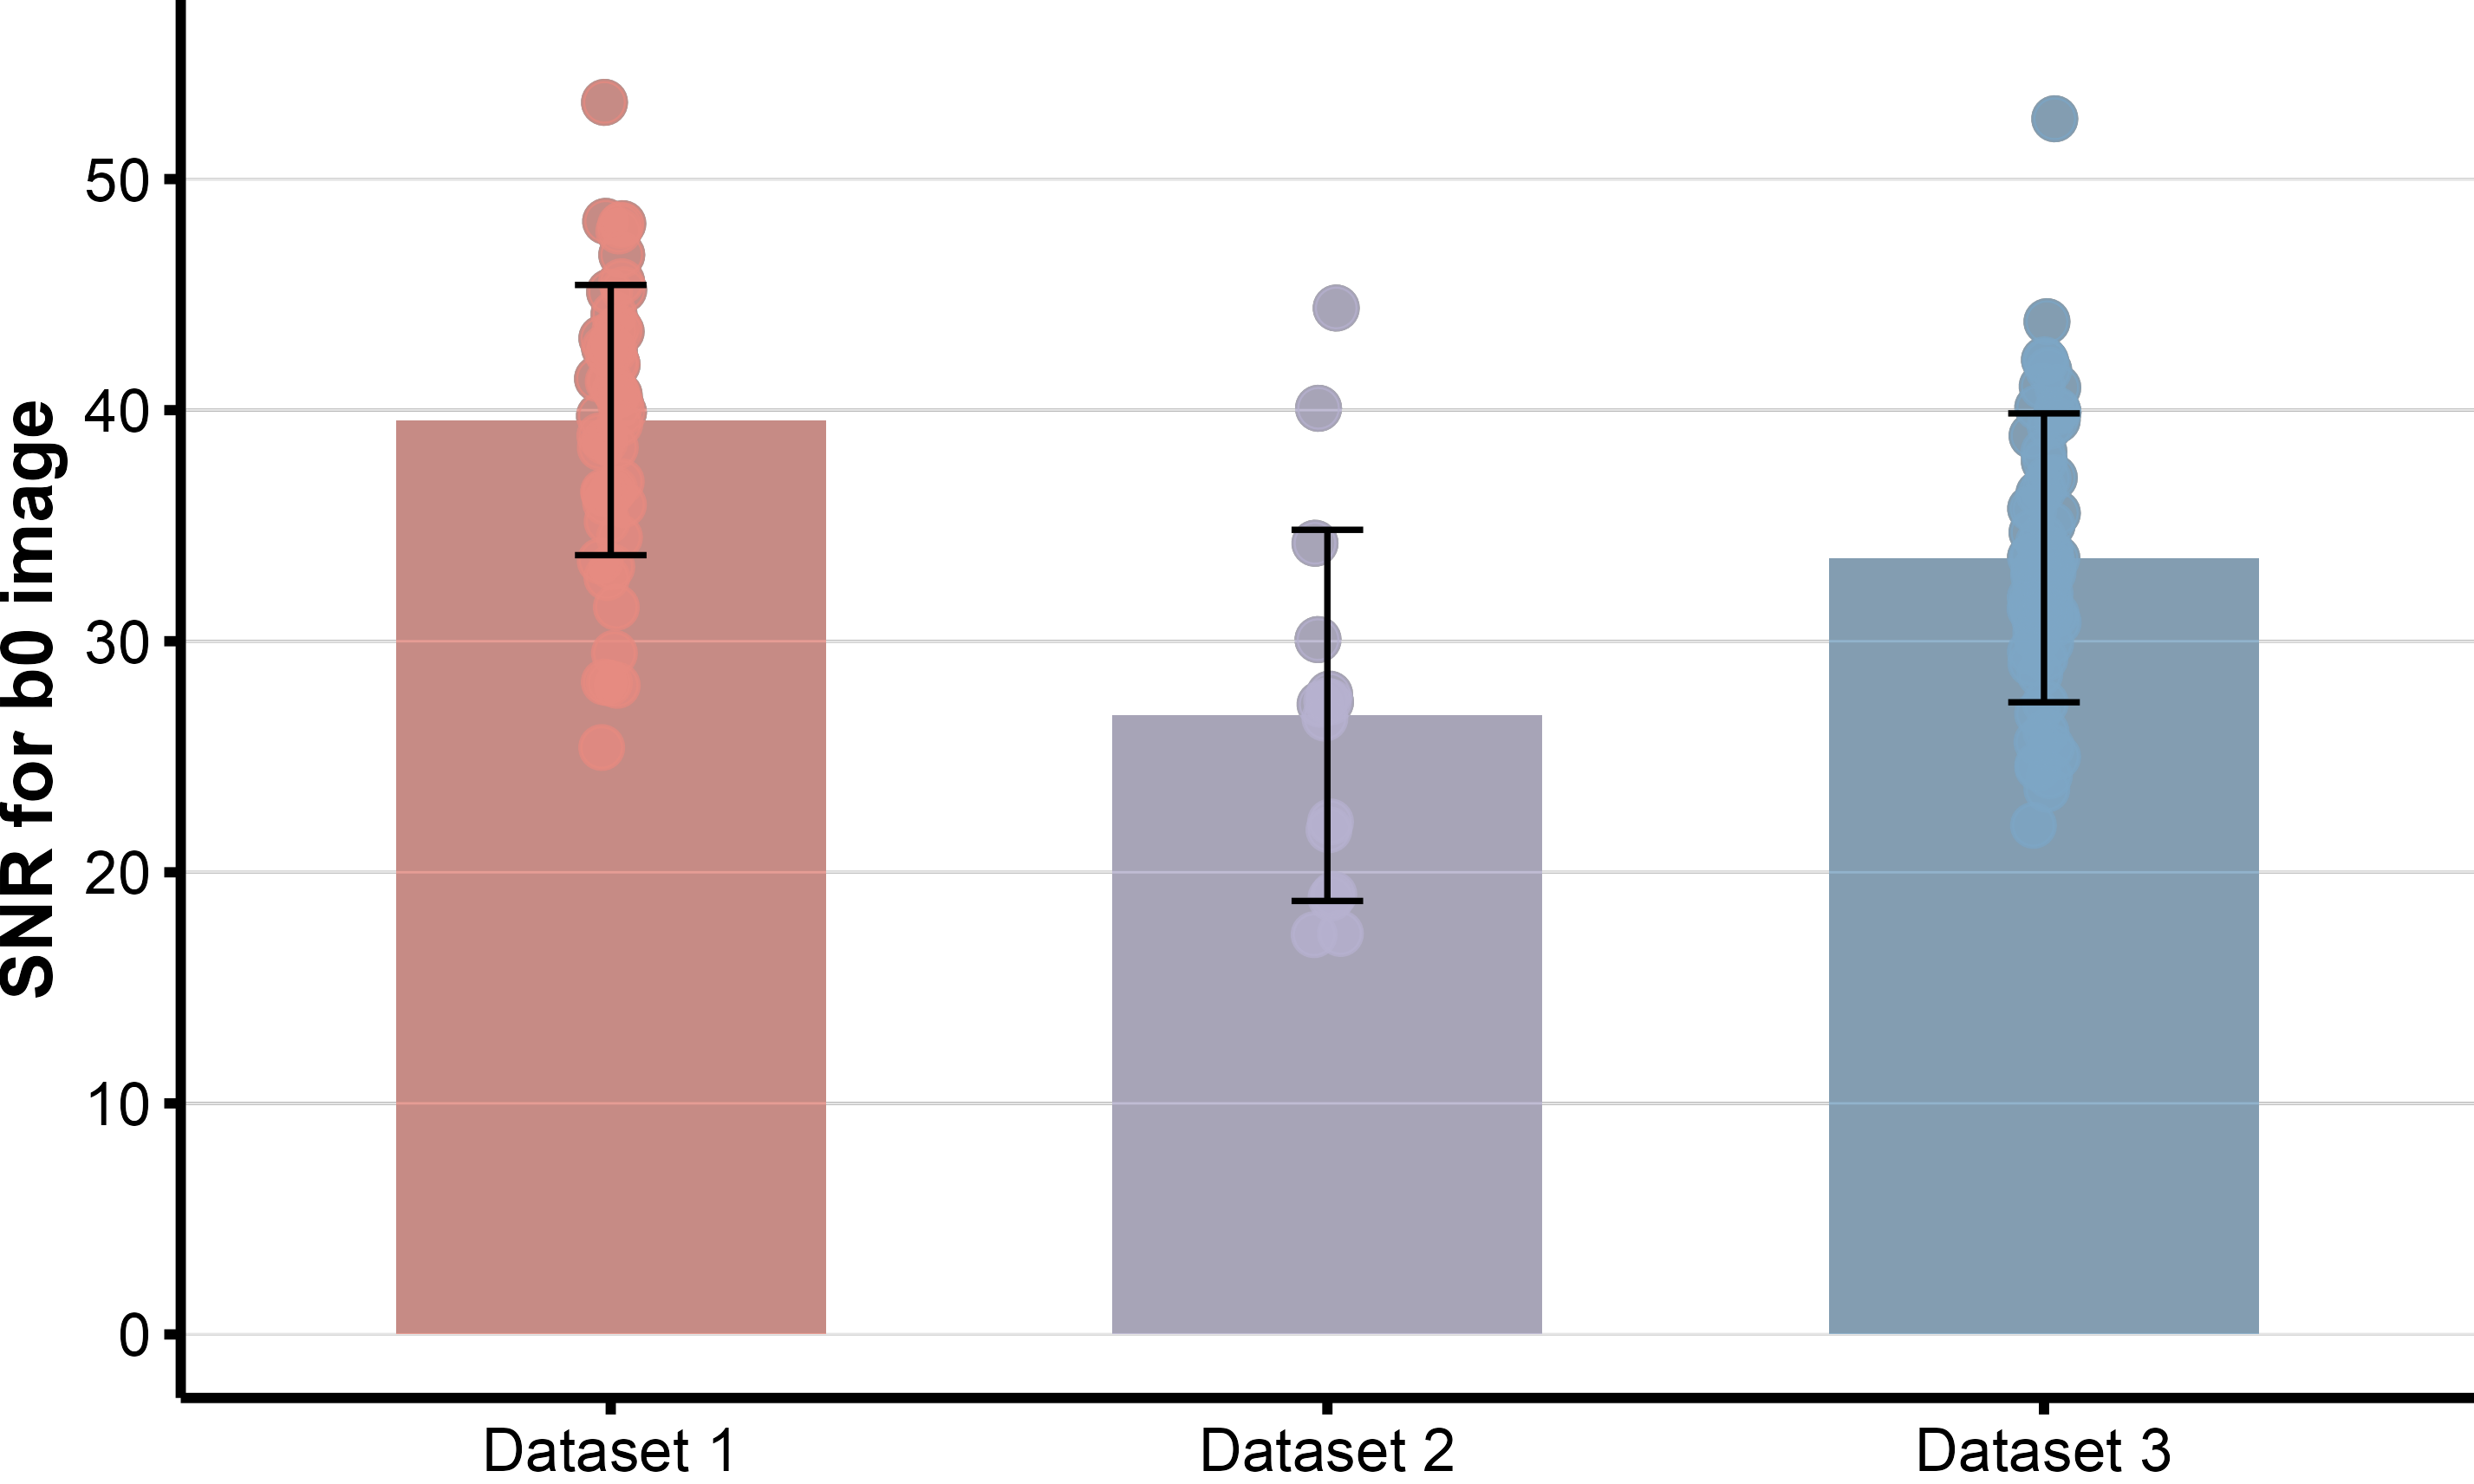


**Figure S1. Temporal signal-to-noise ratio for b0 images across all included datasets.**


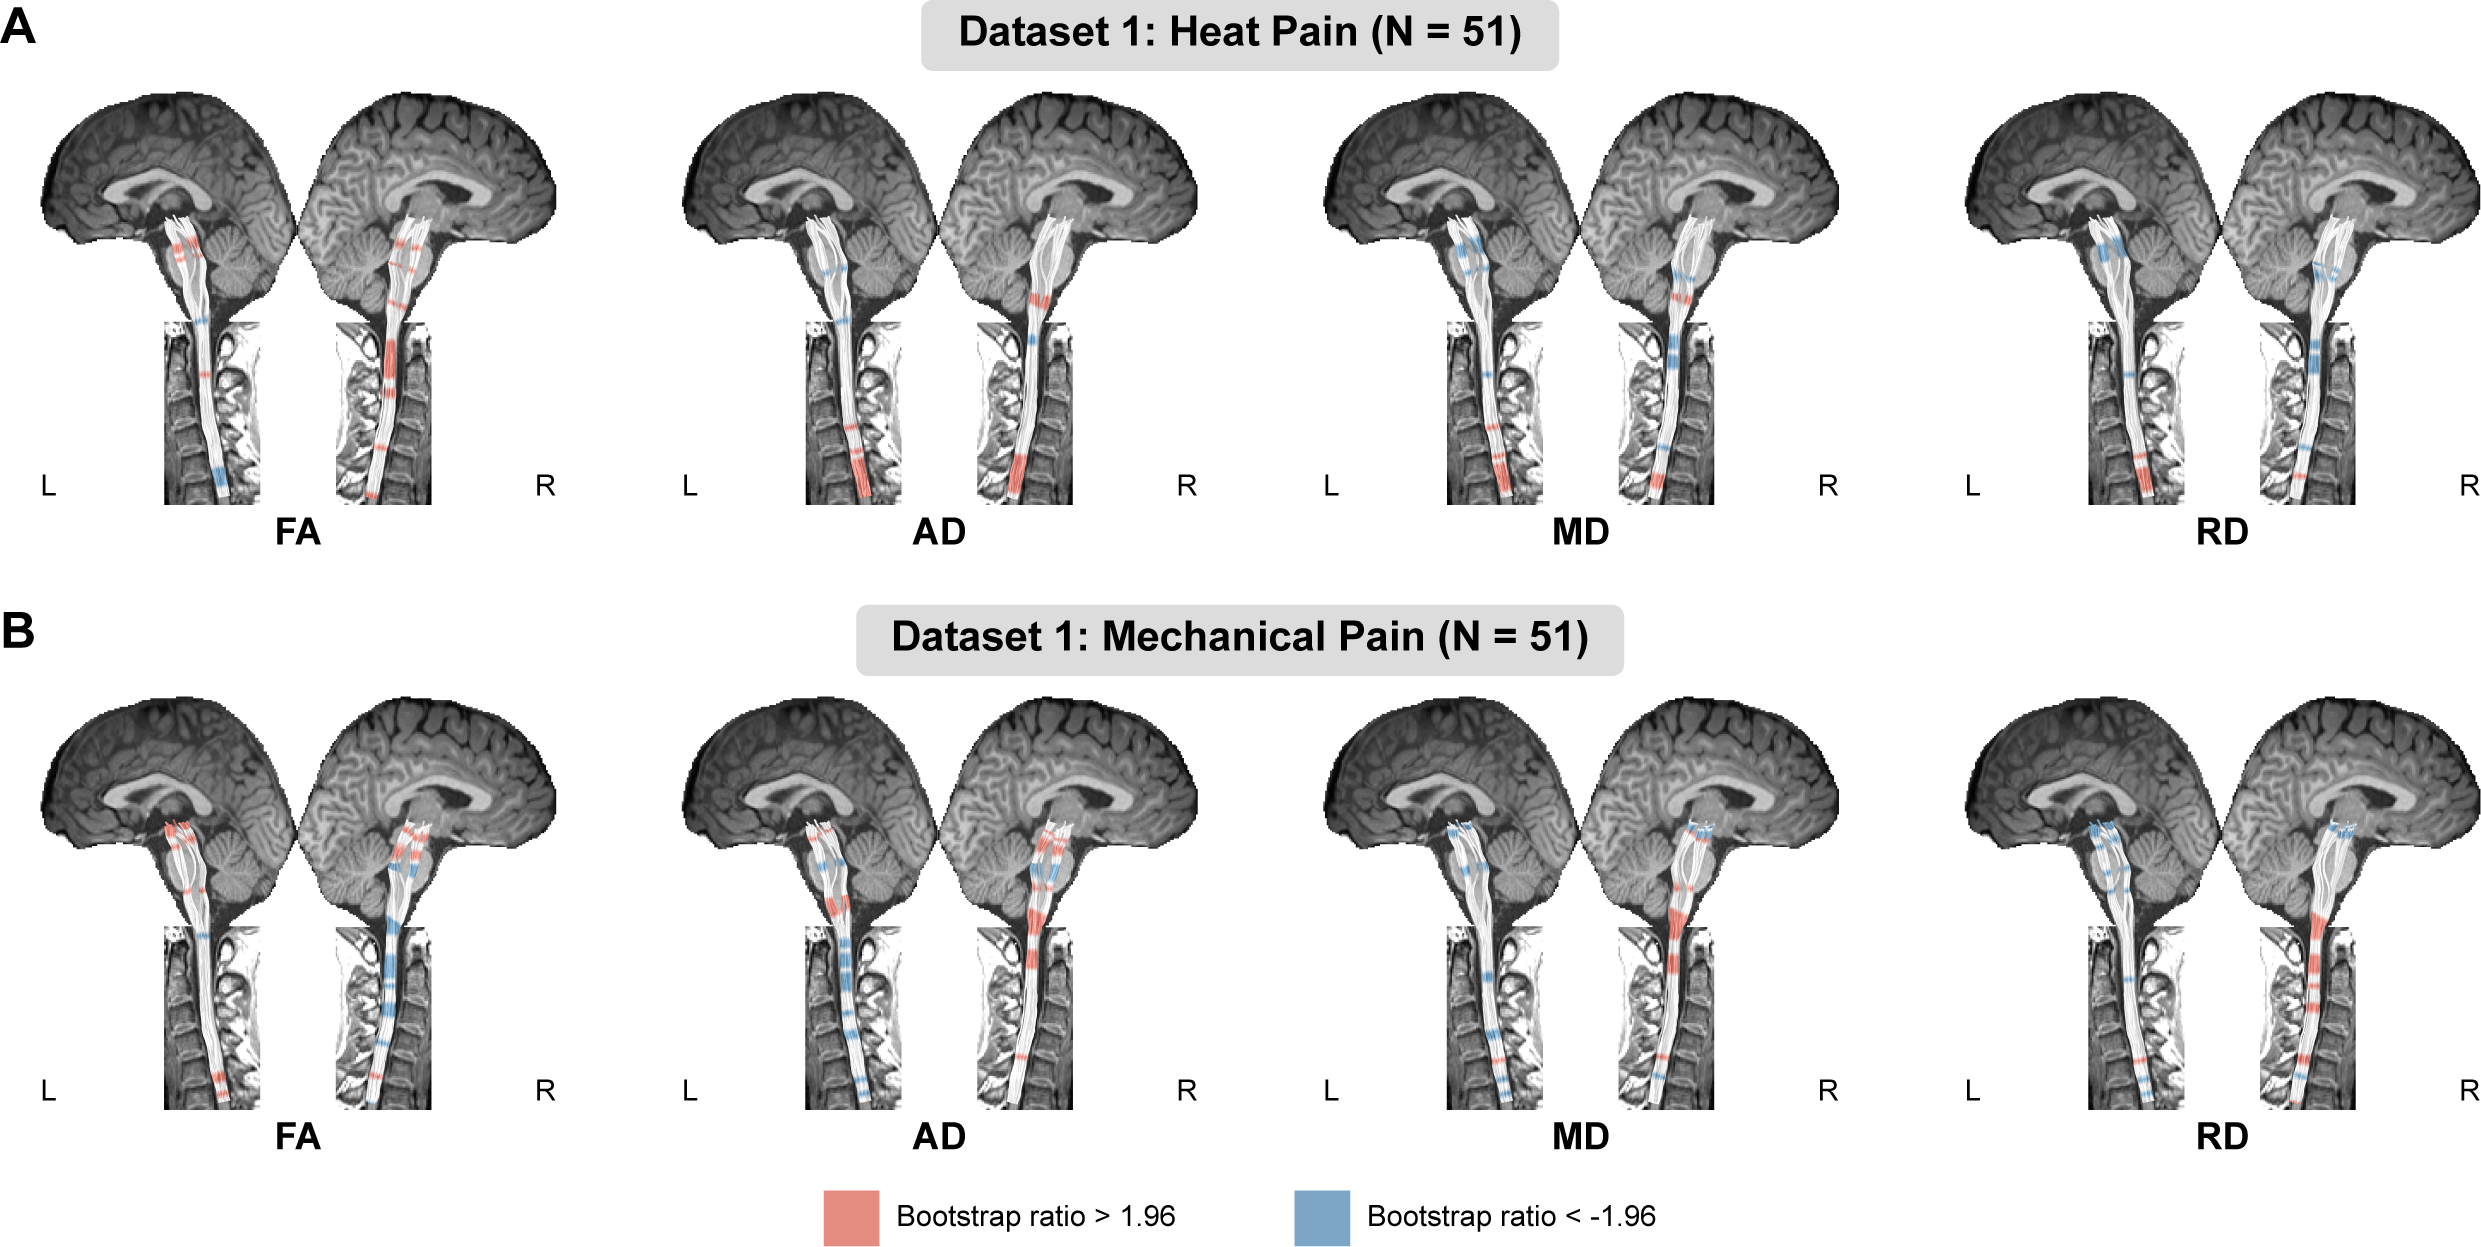


**Figure S2. Pain measurements correlations in different pain condition in Dataset 1.** Pain measurements varied considerably across individuals. This interindividual variability correlated with STT microstructural properties along in a wide range of areas.
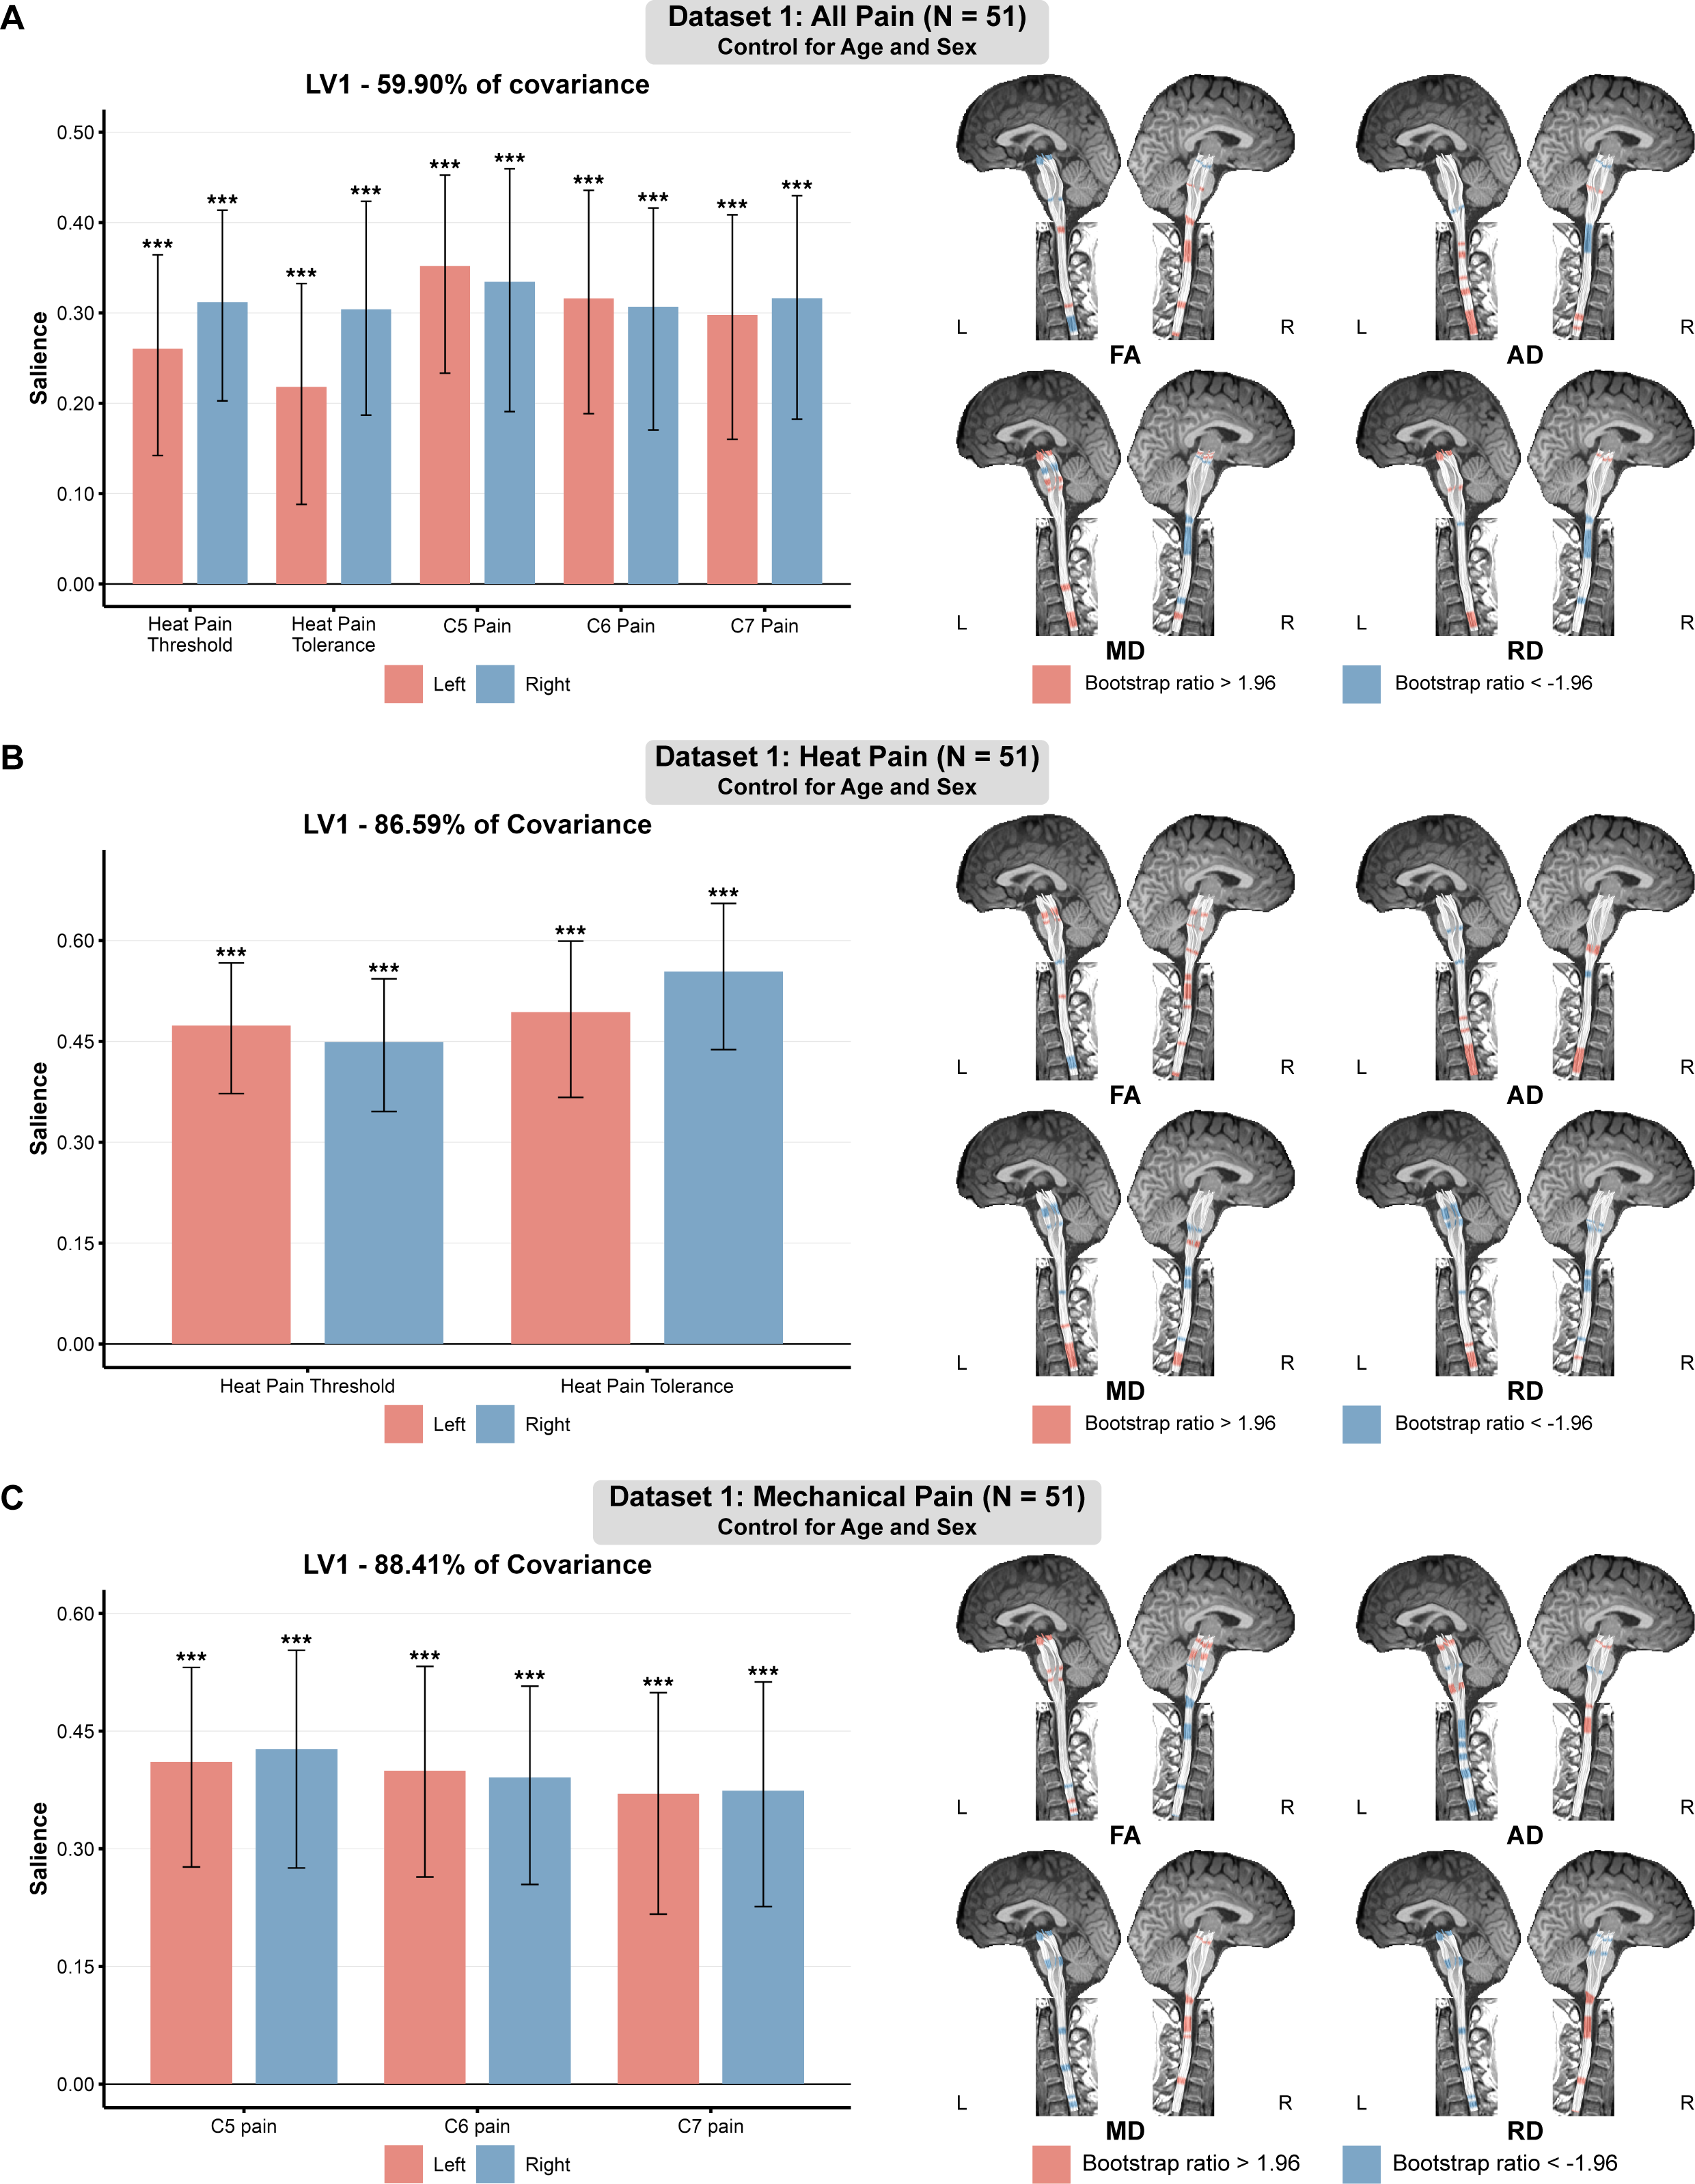


**Figure S3. Comparison of results after controlling for sex and age in Dataset 1 for pain measurements.** Additional control for sex and age had no substantial effect on the associations between STT microstructural properties and pain measurements. Abbreviation: FA = Fractional anisotropy; AD = Axial diffusivity; MD = Mean diffusivity; RD = Radial diffusivity.


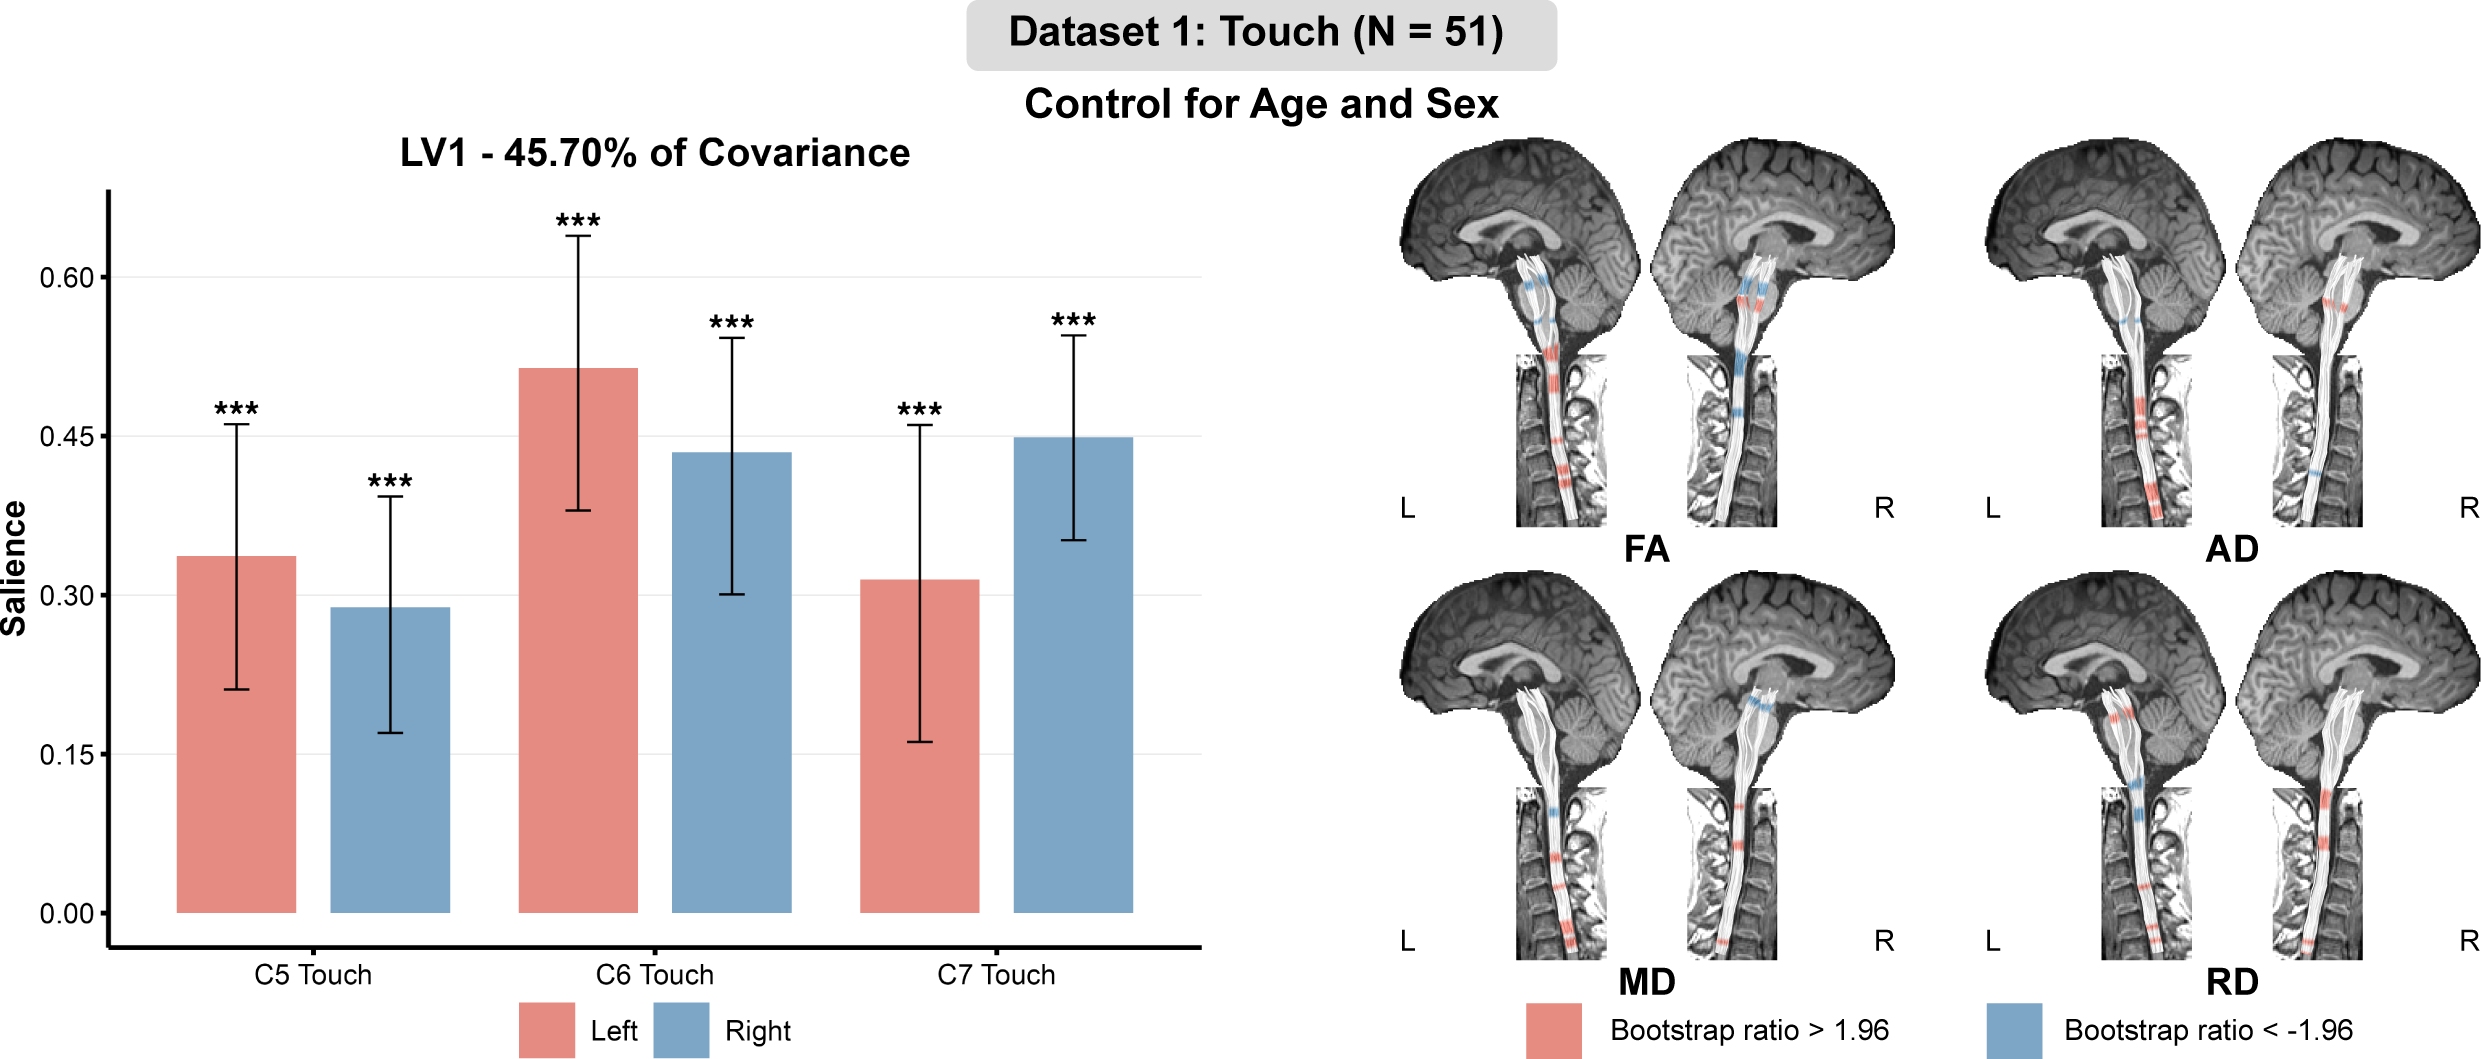


**Figure S4. Comparison of results after controlling for sex and age in Dataset 1 for tactile measurements.** Additional control for sex and age had no substantial effect on the associations between white-matter microstructural properties along spinothalamic tracts and tactile measurements. Abbreviation: FA = Fractional anisotropy; AD = Axial diffusivity; MD = Mean diffusivity; RD = Radial diffusivity.


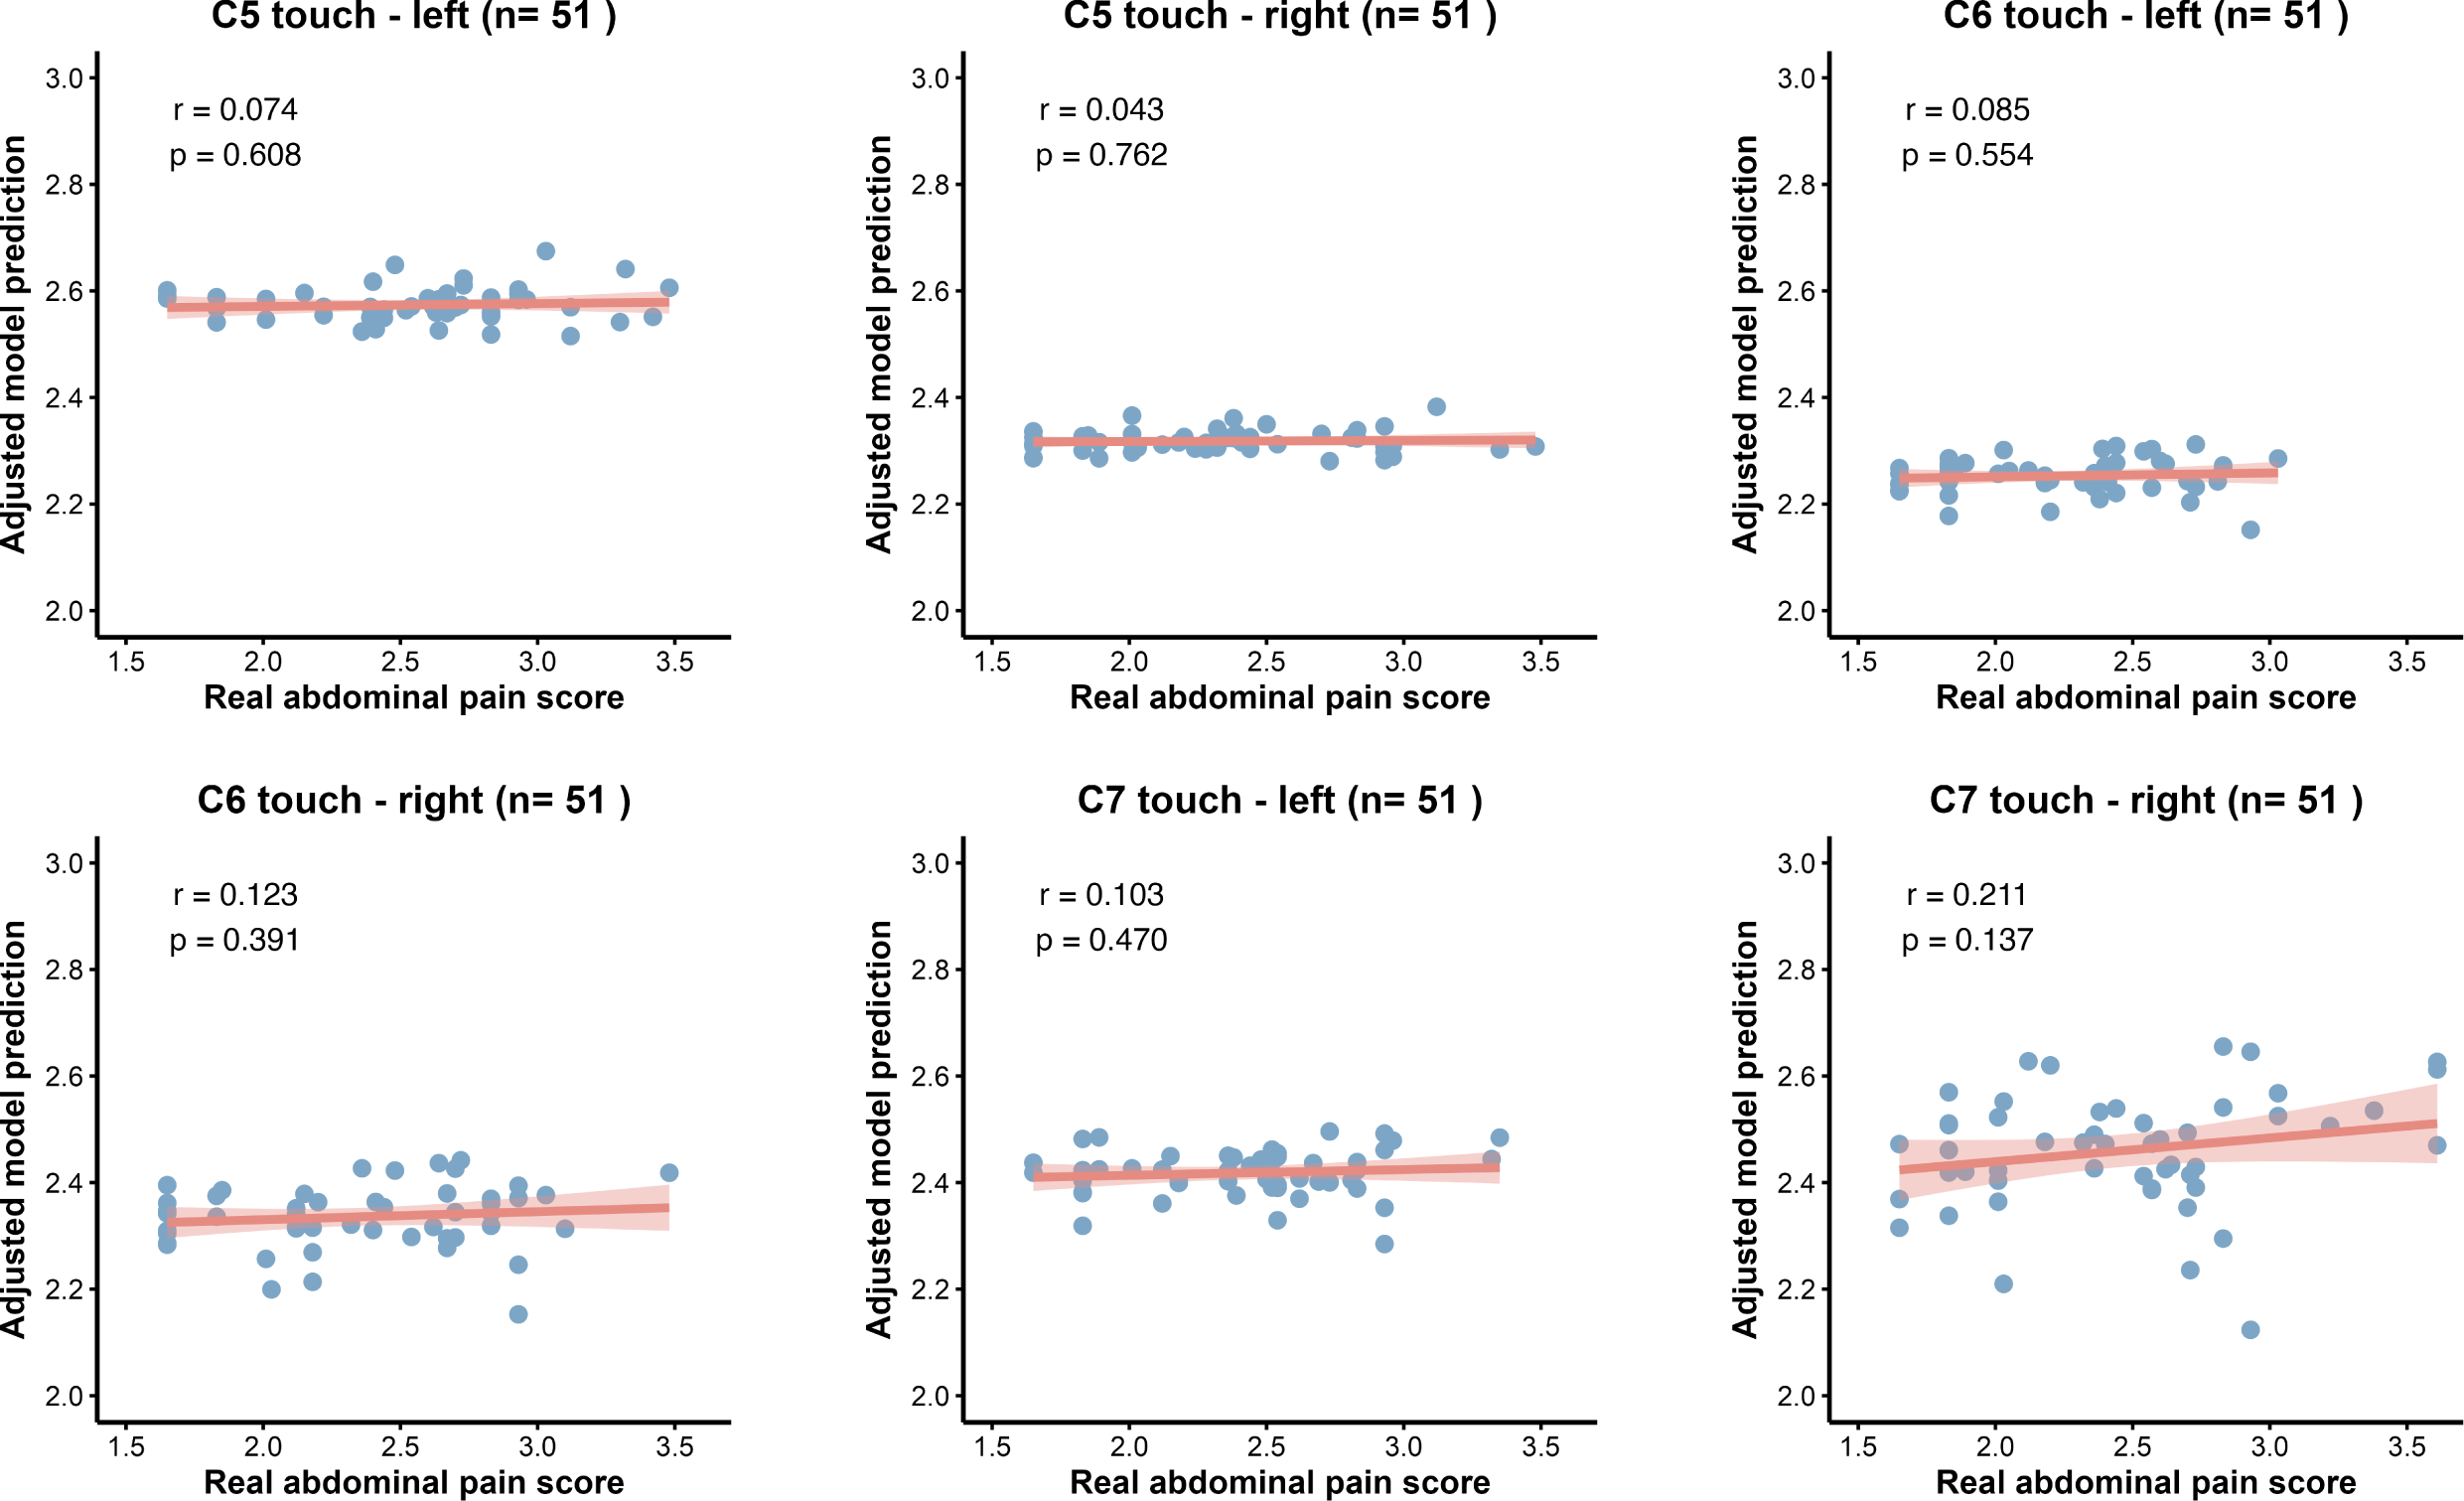


**Figure S5. Predictions of the PLSC-PCR model in tactile sensitivity.** Consistent with earlier results, the pain-derived STT pattern did not predict tactile sensitivity (p > 0.05).


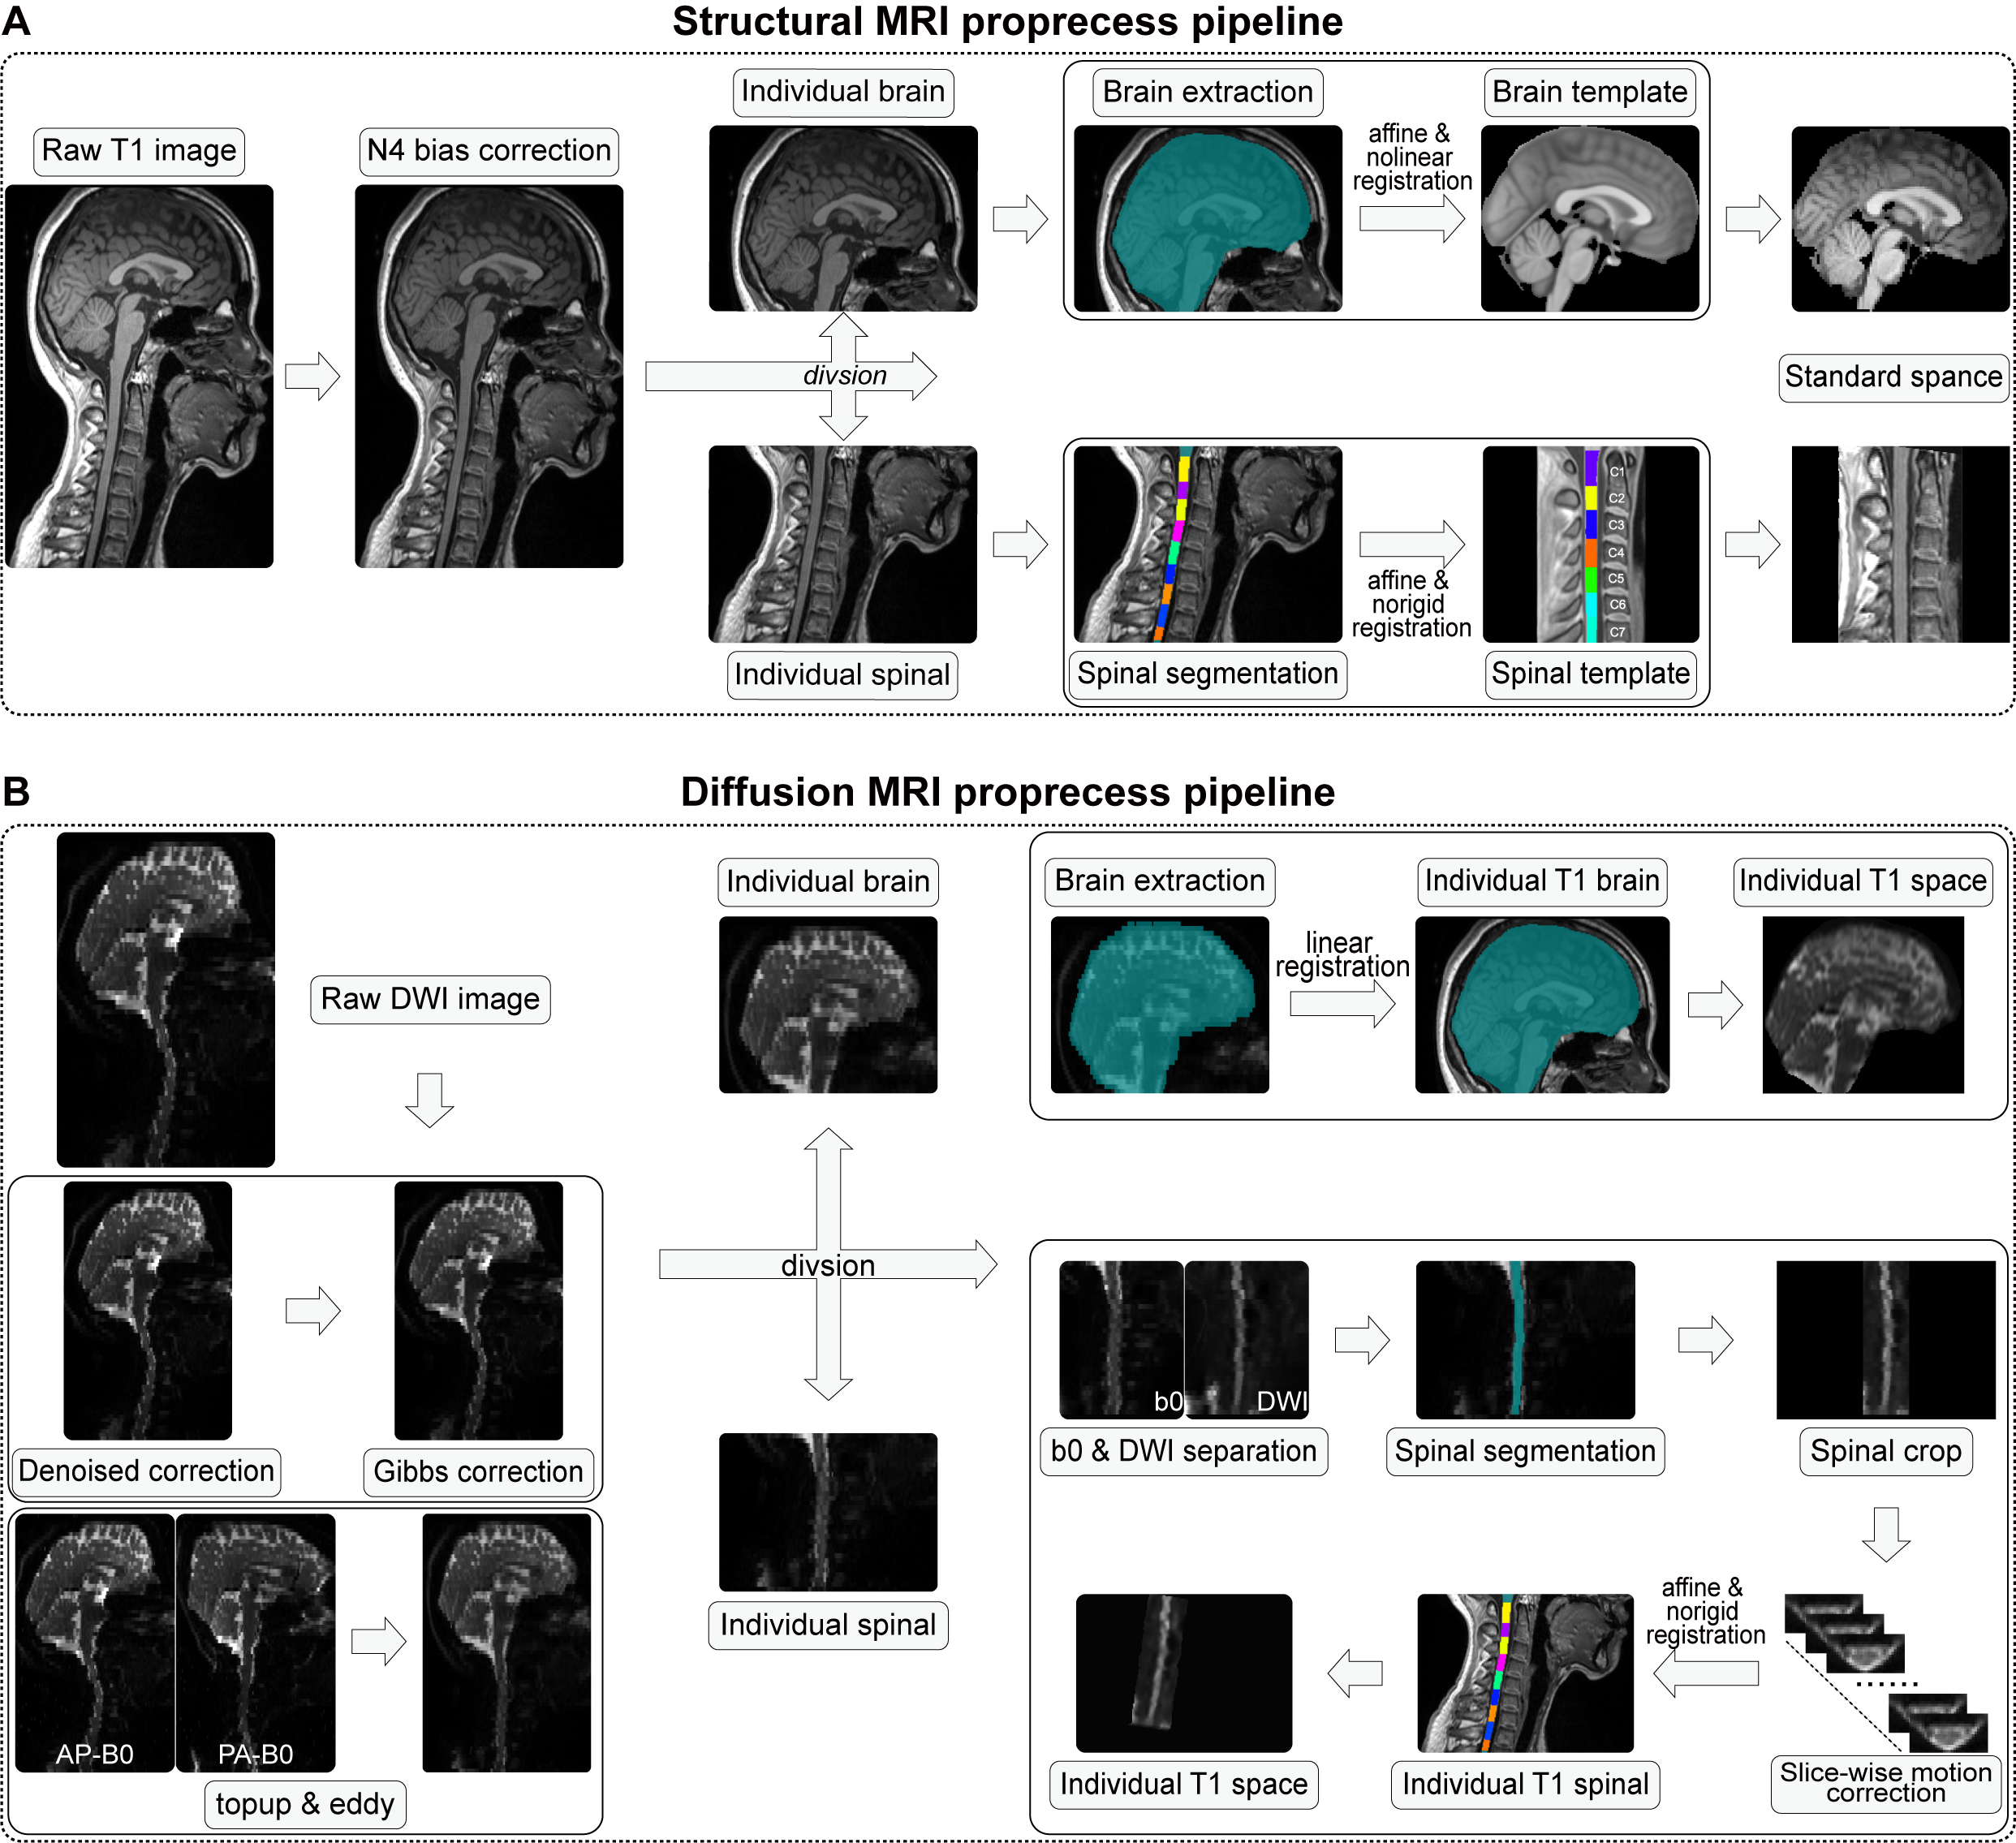


**Figure S6. Preprocessing pipeline for structural and diffusion MRI.** (A) Structural MRI preprocessing: steps include field bias correction, separation of the brain and spinal cord regions, brain tissue extraction, brain image registration, spinal cord segmentation, and registration of spinal cord images. (B) Diffusion MRI preprocessing: steps include Marchenko-Pastur principal component denoising, Gibbs ringing artifact removing, Susceptibility-induced and Eddy current distortions, separation of the brain and spinal cord, brain tissue extraction, brain image registration, spinal cord segmentation, spinal cord crop, Slice-wise motion correction, and registration of spinal cord images.


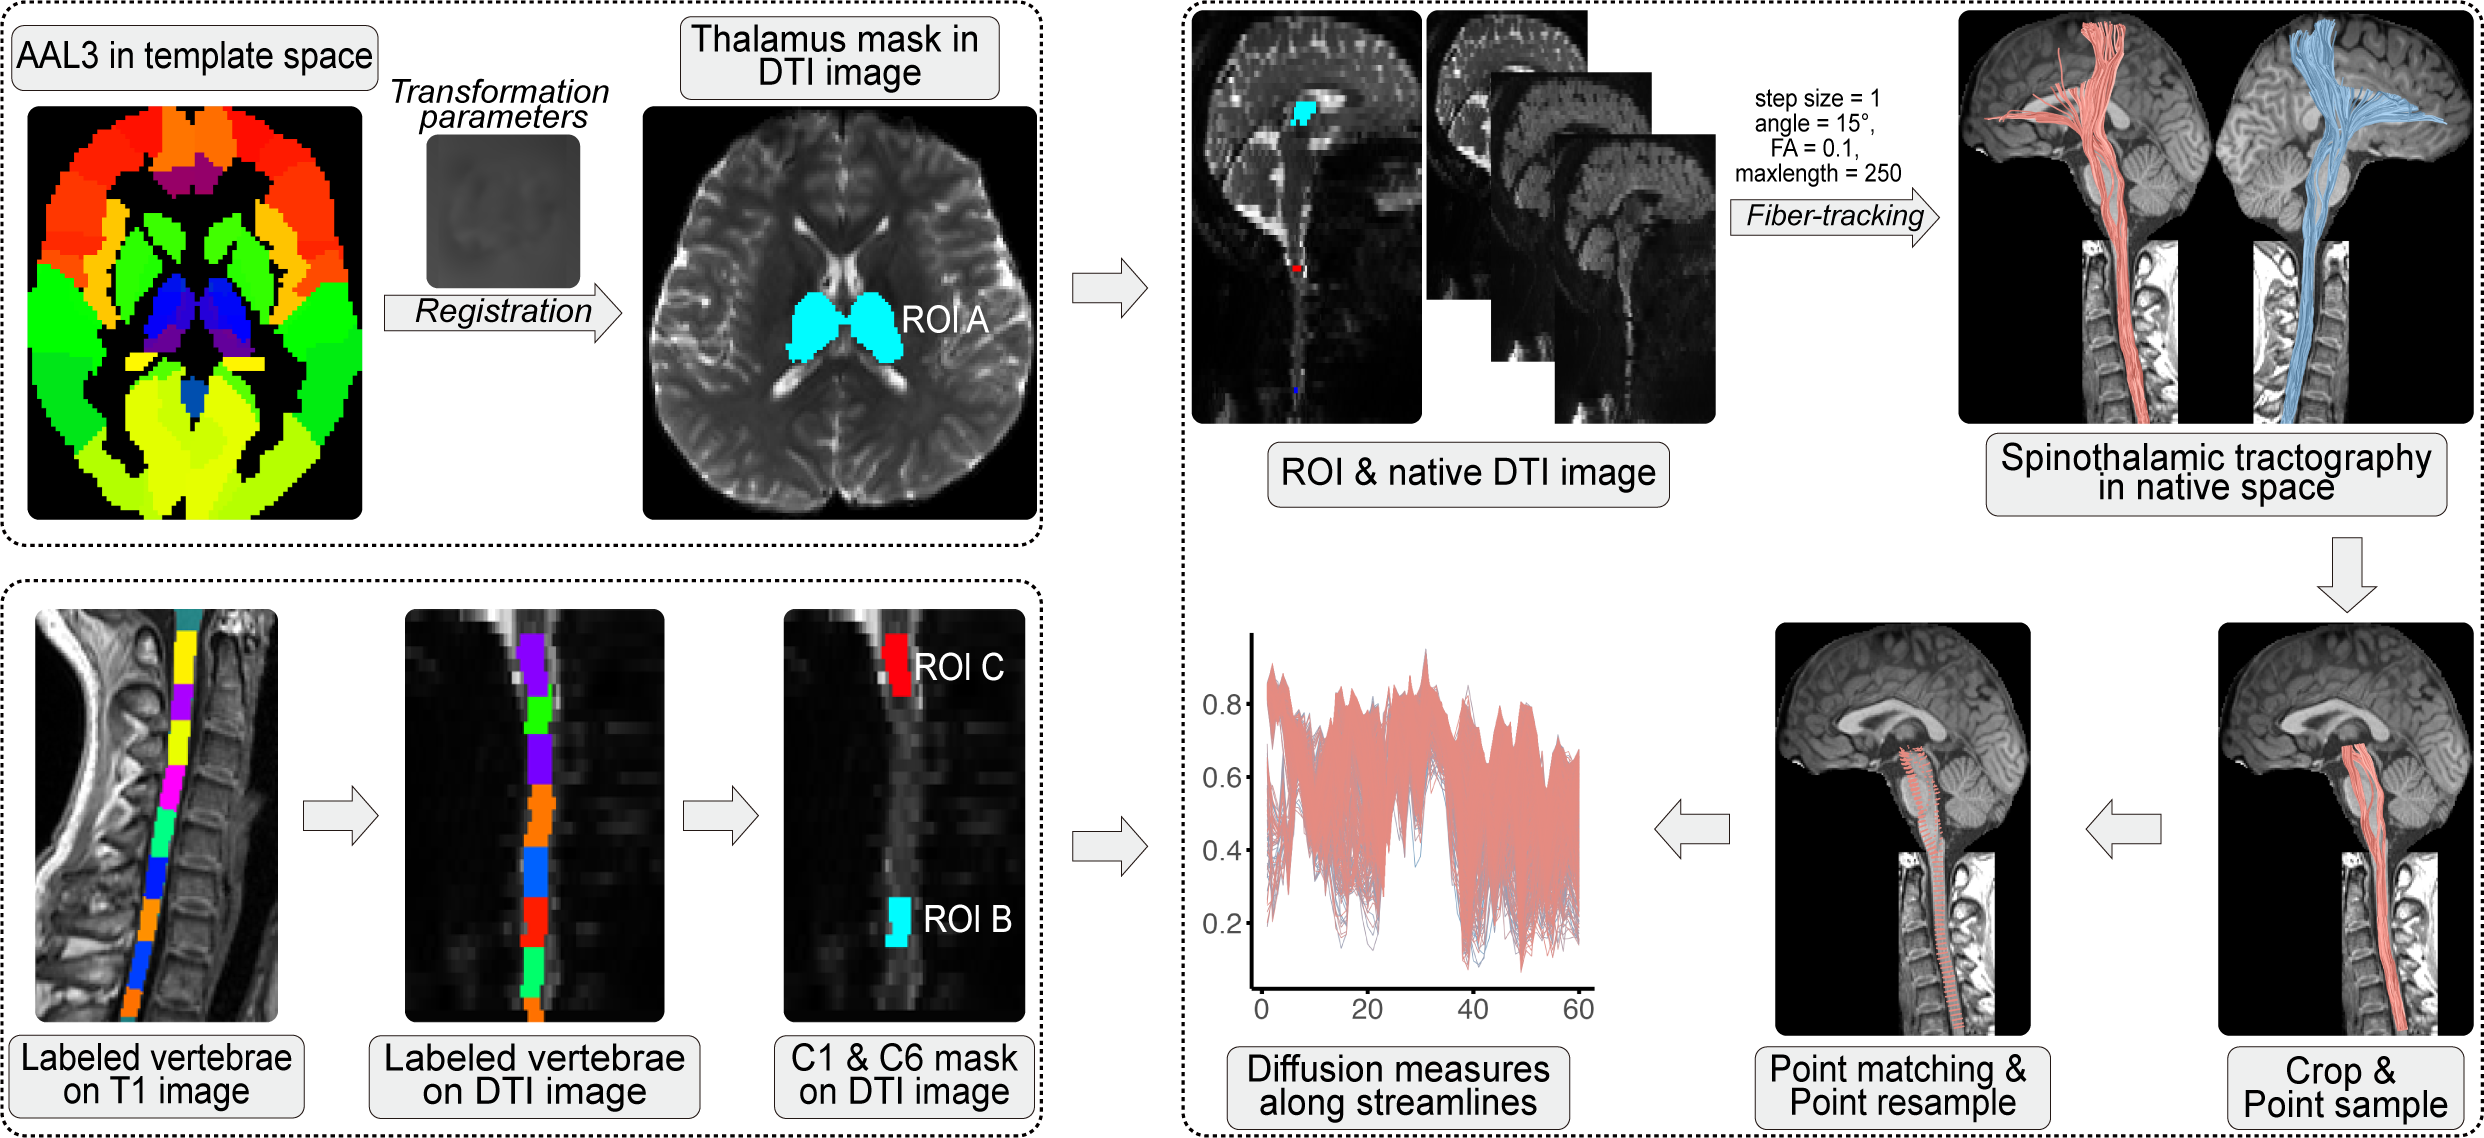


**Figure S7. Preprocessing pipeline for spinothalamic tracts.** The pipeline includes registration of regions of interest in brain and spinal cord, tractography of spinothalamic tracts, tract crop, point sample, point matching, point resample, and extraction of diffusion measures along streamline. Abbreviation: AAL3 = Automated Anatomical Labeling 3; ROI = region of interest.


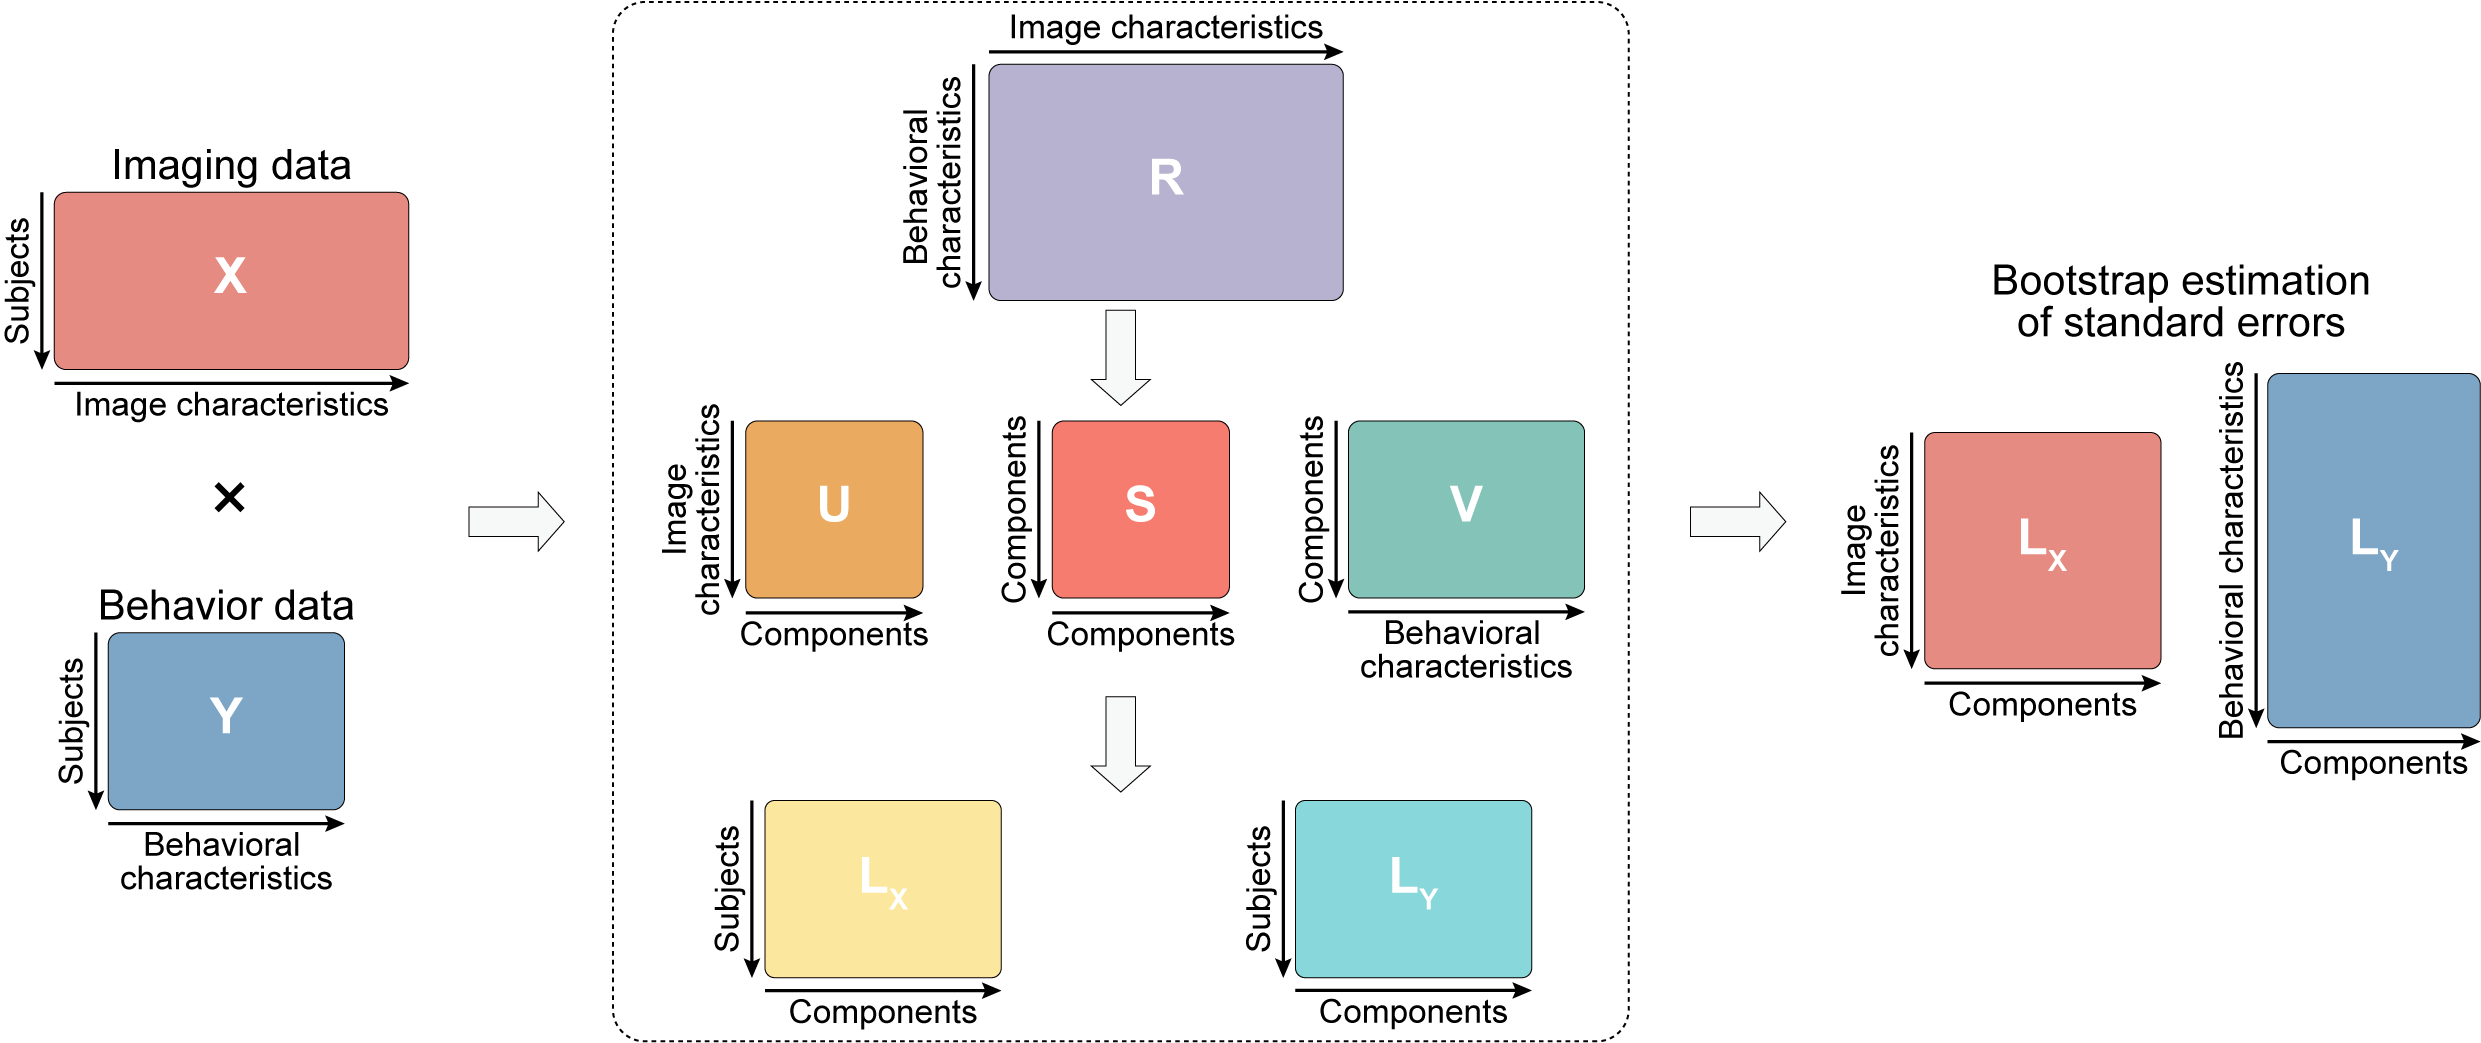


**Figure S8. PLSC pipeline for multivariate correlation analysis.**


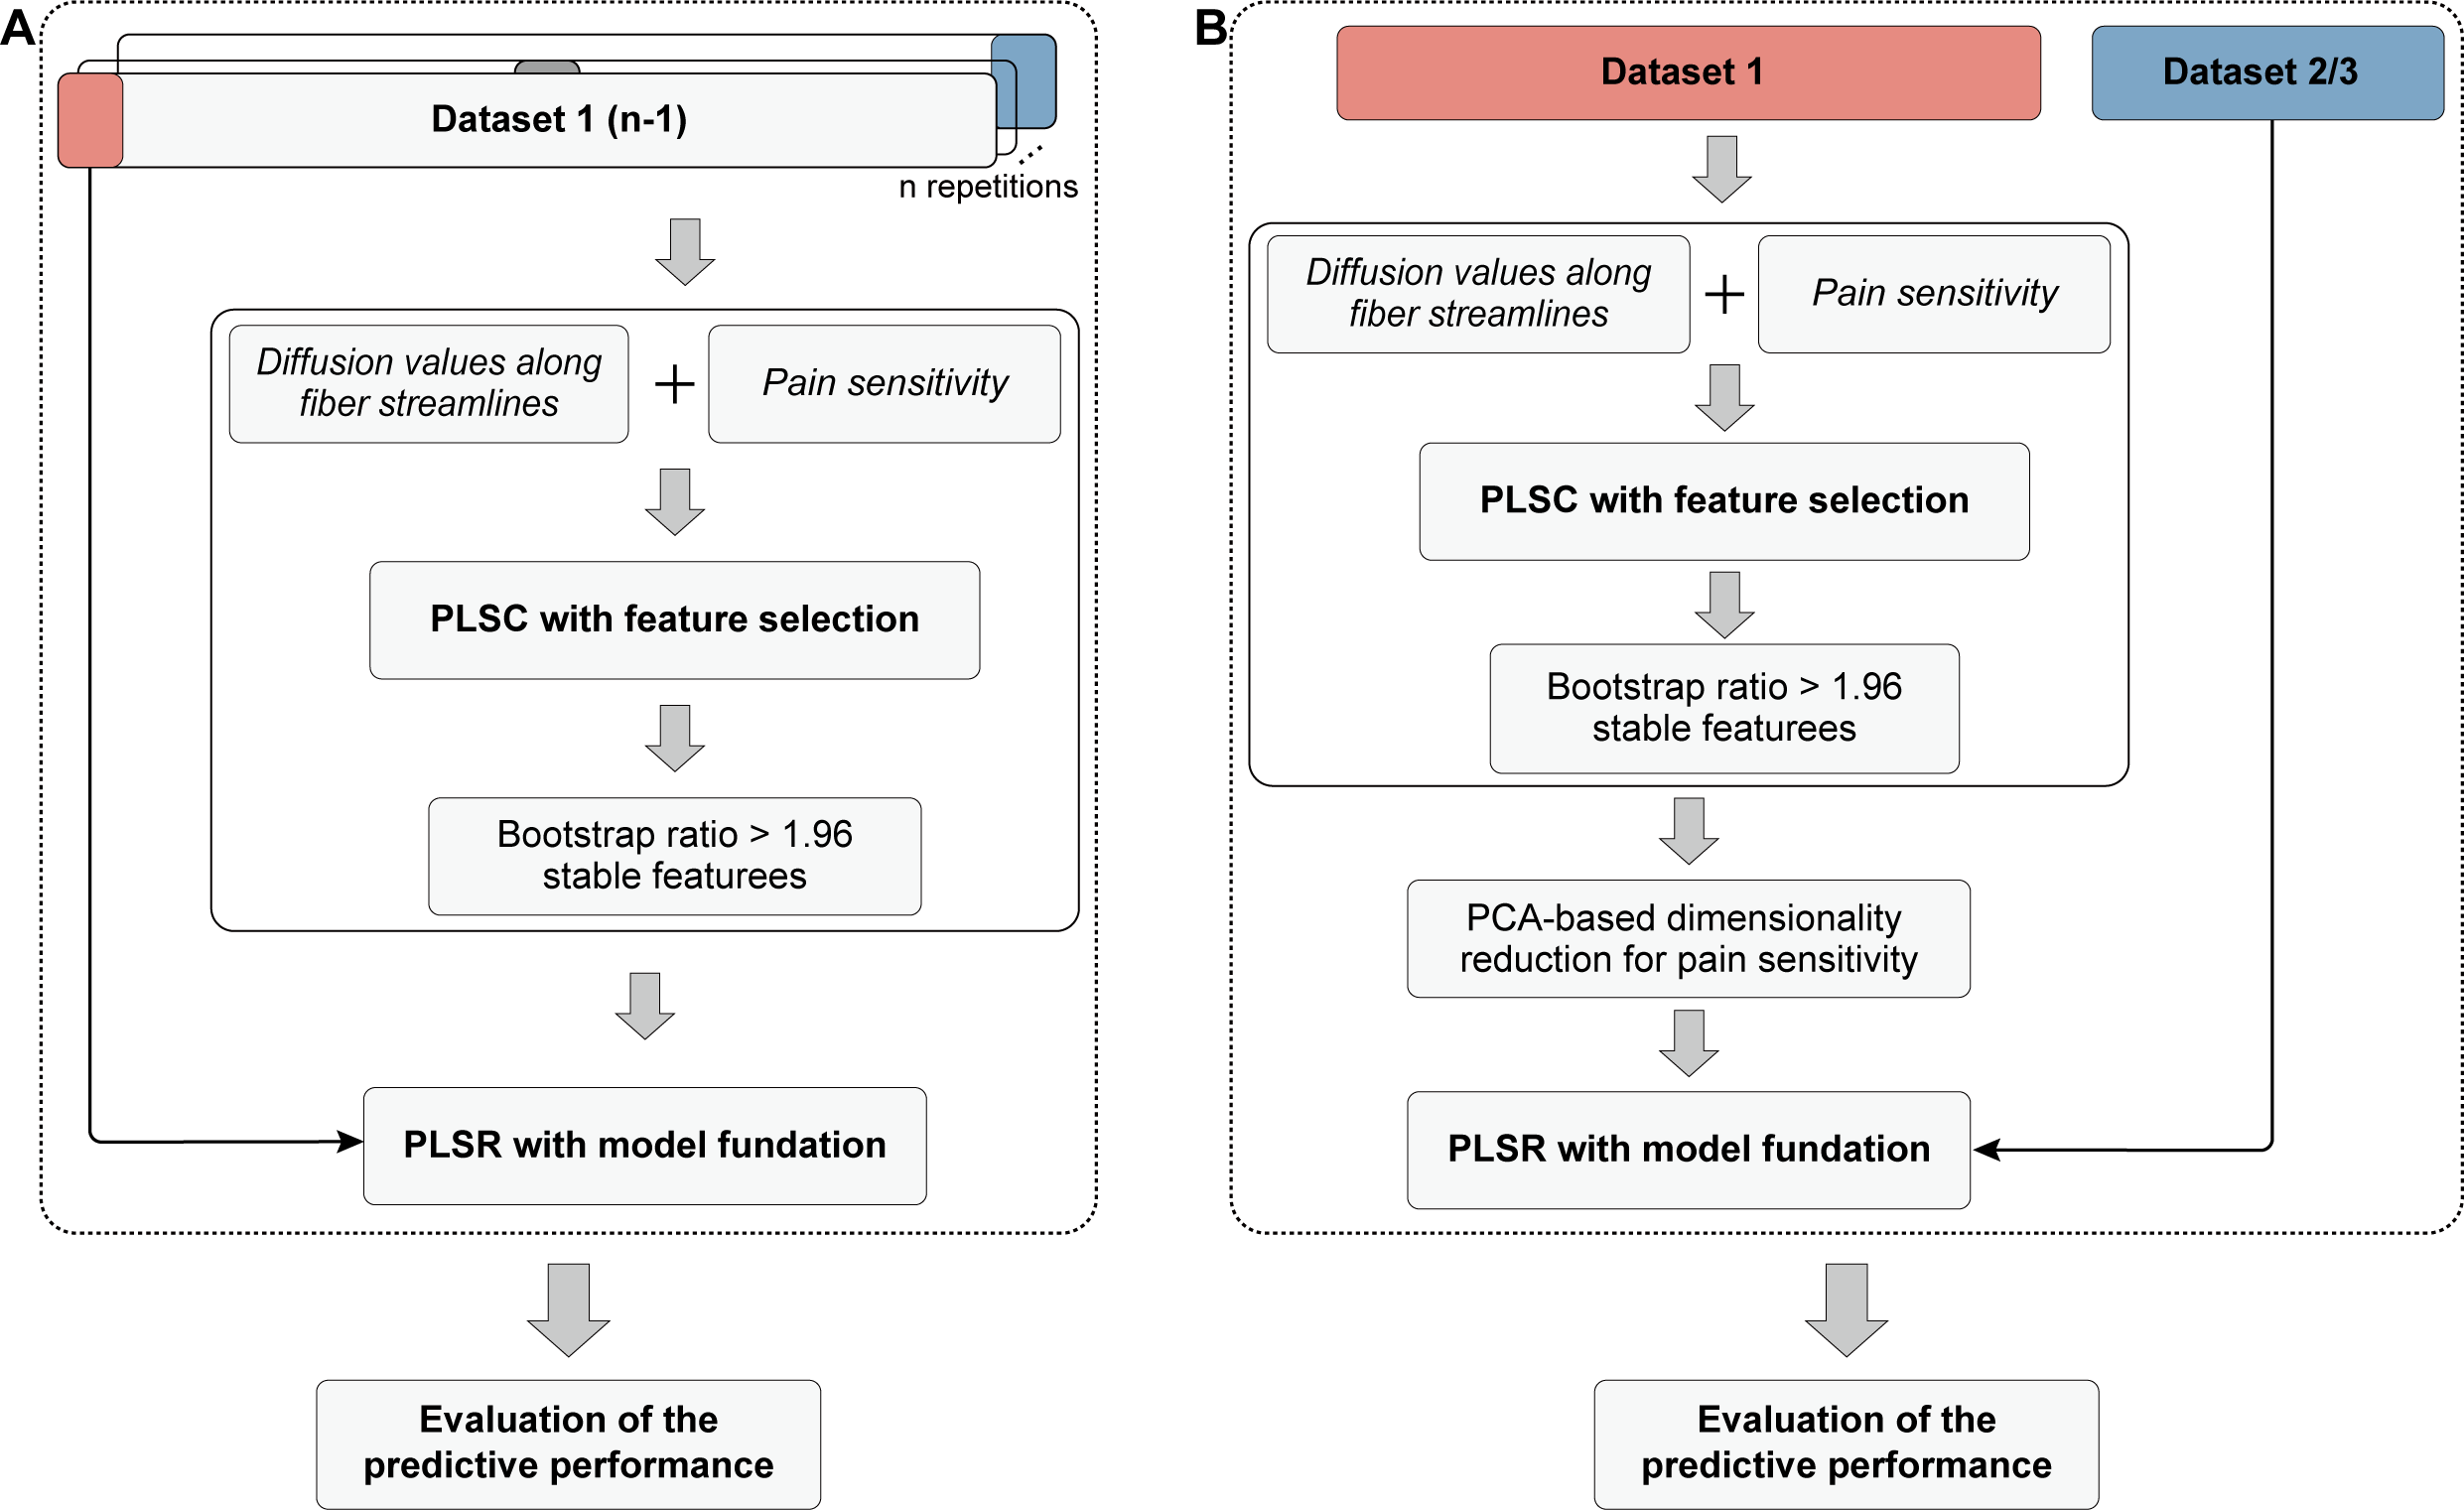


**Figure S9. Processing pipeline for multivariate pattern prediction analysis. (**A) The predicted pipeline for PLSC-PLSR model. (B) The predicted pipeline for PLSC-PCR model.

**Table S1. Intensity ratings in different datasets**

| Datasets | Condition |  | Mean | SD | Min | Max |
| --- | --- | --- | --- | --- | --- | --- |
| Dataset 1 | Heat Pain Threshold (℃) | L | 40.76 | 3.44 | 34.75 | 46.38 |
| R | 41.33 | 3.59 | 34.75 | 47.45 |
| Heat Pain Tolerance (℃) | L | 45.96 | 2.93 | 37.95 | 51.57 |
| R | 45.93 | 3.01 | 37.98 | 51.50 |
| C5 Pain Threshold (a.u.) | L | 5.13 | 0.85 | 3.42 | 6.65 |
| R | 4.90 | 0.92 | 3.42 | 6.65 |
| C6 Pain Threshold (a.u.) | L | 5.21 | 1.00 | 3.42 | 6.65 |
| R | 5.13 | 0.98 | 3.51 | 6.65 |
| C7 Pain Threshold (a.u.) | L | 5.10 | 0.98 | 3.42 | 6.65 |
| R | 5.07 | 0.99 | 3.61 | 6.65 |
| C5 Touch Threshold (a.u.) | L | 2.57 | 0.45 | 1.65 | 3.48 |
| R | 2.32 | 0.49 | 1.65 | 3.48 |
| C6 Touch Threshold (a.u.) | L | 2.25 | 0.39 | 1.65 | 3.03 |
| R | 2.34 | 0.49 | 1.65 | 3.48 |
| C7 Touch Threshold (a.u.) | L | 2.42 | 0.42 | 1.65 | 3.35 |
| R | 2.46 | 0.52 | 1.65 | 3.61 |
| Dataset 2 | Neuralgia Pain Score | subacute herpes phase | 8.19 | 1.58 | 6.00 | 10.00 |
| Dataset 3 | Abdominal Pain Score | two-screening phase | 4.83 | 1.45 | 3.00 | 8.57 |

L, left; R, right.
